# Supplementary material for: Toward a global calibration for quantifying past oxygenation in oxygen minimum zones using benthic Foraminifera
Source: Copernicus journal article supplement (doi:10.5194/bg-18-2827-2021), 2021-05-10
Supplement: Supplementary file 1 [file Table S1.xlsx]

## Sheet: O2 Estimation
Dysoxic (%)	Suboxic (%)	Oxic (%)		[O2] estimation		Instruction
				missing data		Fill at least two out of the three "dysoxic, suboxic, and oxic" relative abundance columns to estimate [O2]
						O2 formulae needs to be manually extended down the sheet using the black cross
