# Supplementary material for: Toward a global calibration for quantifying past oxygenation in oxygen minimum zones using benthic Foraminifera
Source: Copernicus journal article supplement (doi:10.5194/bg-18-2827-2021), 2021-05-10
Supplement: Supplementary file [file bg-18-2827-2021-supplement-title-page.pdf › bg-18-2827-2021-supplement-title-page.pdf]

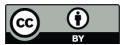

## *Supplement of*

# **Toward a global calibration for quantifying past oxygenation in oxygen minimum zones using benthic Foraminifera**

**Martin Tetard et al.**

*Correspondence to:* Martin Tetard (tetard.martin@gmail.com)

- bg-18-2827-2021-supplement-title-page.pdf
- Supplement
  - .DS\_Store
  - MorFo\_ijm
  - Table S1.xlsx
  - Table S2.xlsx
  - ~\$Table S1.xlsx

The copyright of individual parts of the supplement might differ from the article licence.
